# Supplementary material
Source: HighWire-hosted journal article supplement (https://jnm.snmjournals.org/highwire/filestream/109324/field_highwire_adjunct_files/0/263409_Supplemental_Data.pdf)
Supplement: 263409_Supplemental_Data.pdf [file 263409_Supplemental_Data.pdf]

**Supplemental Video 1:** Demonstration of IMI guided localization of a chondrosarcoma metastatic lesion with ICG. The lesion was followed with serial cross-sectional imaging in a patient with high grade chondrosarcoma that was resected 11 months prior. Standard white light (left), NIR (middle), and overlay (right) video sequences are demonstrated in the segment in a similar manner that the thoracic surgeon would view during the operation.

**Supplemental Video 2:** IMI guided detection of an occult lesion that was discovered in the same patient as Video 1. This nodule was not noted on cross sectional surveillance imaging. Standard white light (left), NIR (middle), and overlay (right) video sequences are demonstrated in the segment in a similar manner that the thoracic surgeon would view during the operation.

Supplemental Table 1. Imaging systems commonly used in IMI (60).

| <b>Imaging System</b> | <b>Company</b>        | <b>Excitation Wavelength</b> | <b>Light Source</b> | <b>Real-Time Overlay</b> | <b>Clinical Applications</b>                                                                          |
|-----------------------|-----------------------|------------------------------|---------------------|--------------------------|-------------------------------------------------------------------------------------------------------|
| <b>SPY</b>            | Novadaq Technologies  | 805                          | Laser               | No                       | Perfusion, Tissue Reconstruction, Lymphatic Mapping, Cerebral Angiography                             |
| <b>FL800/400</b>      | Leica                 | 750-850                      | Xenon Light         | No                       | Cerebral Angiography                                                                                  |
| <b>PDE NEO II</b>     | Hamamatsu Photonics   | 760                          | LED                 | Yes                      | Lymphatic Mapping, Perfusion                                                                          |
| <b>Infrared 800</b>   | Zeiss                 | 700-780                      | Laser               | No                       | Neuro-oncology                                                                                        |
| <b>Fluobeam LX</b>    | Fluoptics             | 680-750                      | Laser               | No                       | Endocrine surgery                                                                                     |
| <b>Quest Spectrum</b> | Olympus               | 400-1000                     | Laser               | Yes                      | Colorectal Surgery, hepaticopancreaticobiliary surgery, breast cancer, lymphatic mapping, lung cancer |
| <b>Iridium</b>        | EleVision (Medtronic) | 805                          | Laser               | Yes                      | Pancreatic cancer, ovarian cancer, lung cancer, neurosurgery, breast cancer, endocrine surgery.       |
| <b>Onlume</b>         | OnLume Surgical       | 778                          | Laser               | Yes                      | Neurosurgery, Tissue Perfusion, Vascular and Reconstructive Surgery, Head and Neck Surgery            |

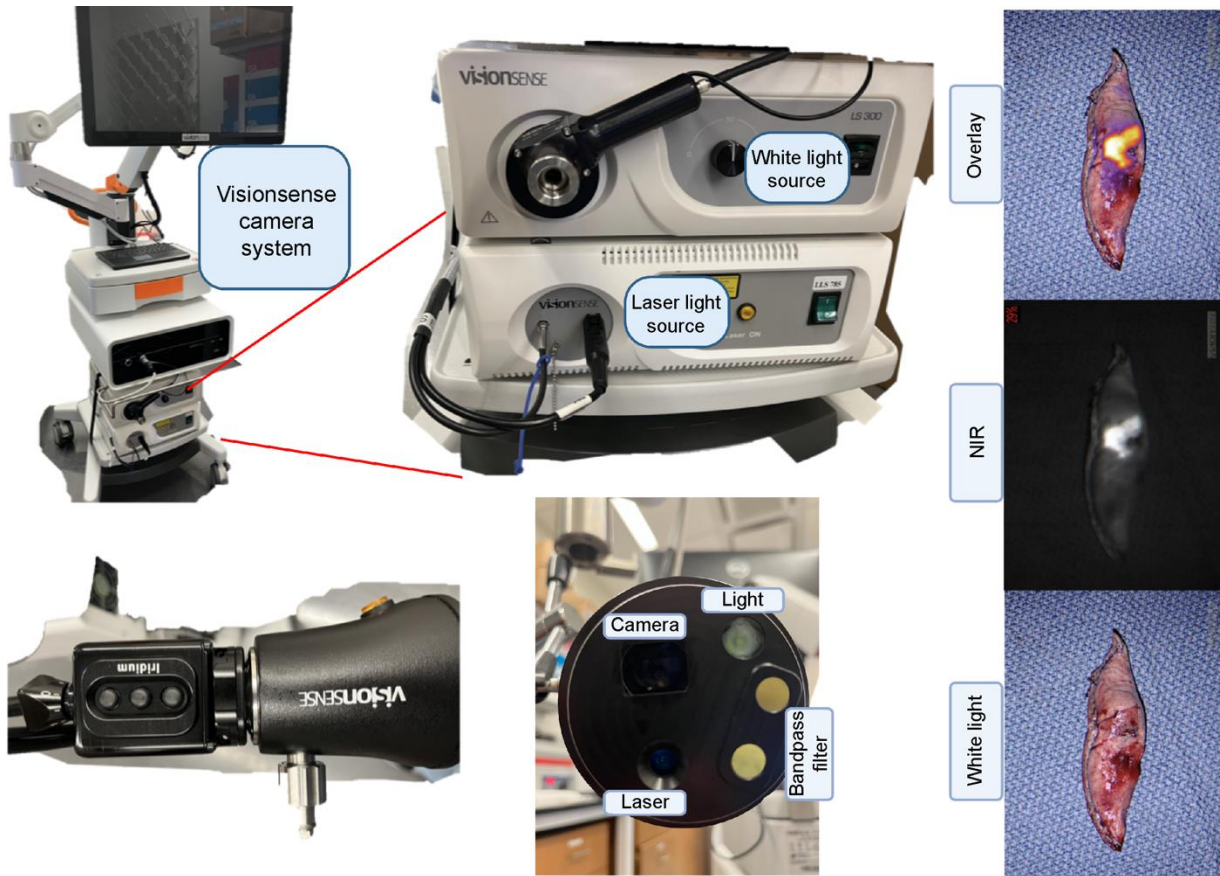

Supplemental Figure 1. The Visionsense camera system features many of the components common to systems used in intraoperative molecular imaging.
